1 Full length Title: Predictors of voluntary uptake of modern  
2 contraceptive methods in rural Sindh, Pakistan

3 **Short Title: Predictors of modern contraceptive methods**  
4

5 Authors:

6 Zahid Memon<sup>1¶\*</sup>, Wardah Ahmed<sup>1¶</sup>, Abeer Mian<sup>1¶</sup>, Muhammad Jawwad<sup>1¶</sup>, Shah Muhammad<sup>1¶</sup>,  
7 Abdul Qayyum Noorani<sup>3¶</sup>, Zulfiqar Bhutta<sup>1¶</sup> and Hora Soltani<sup>2£</sup>

8 Affiliations:

9 1 The Aga Khan University

10 2 Sheffield Hallam University

11 3 Aga Khan Foundation

12 Country of Residence:

13 ¶ Pakistan

14 £ United Kingdom

15 \*Corresponding author email address: [zahid.memon@aku.edu](mailto:zahid.memon@aku.edu)  
16  
17  
18  
19  
20  
21  
22  
23  
24  
25  
26  
27  
28  
29

30

## 31 **Abstract**

32 Introduction: The use of modern contraceptive methods (MCMs) in Pakistan has been stagnant for  
33 the last decade. In Sindh, current contraceptive use is at 28.9%, of which 25% is MCMs use. Such  
34 a low uptake translates into high unmet need 17% amongst married women. To bridge the gap  
35 between the health system and beneficiaries, there is a need to assess predictors that influence  
36 voluntary uptake of MCMs among women, at the health services and individual levels.

37 Methods: A cross-sectional household survey was conducted in two districts of Sindh, Pakistan  
38 namely Matiari and Badin .In total, 1684 Married Women of Reproductive Age (MWRA) 15-49  
39 years were interviewed. For the selection of eligible respondents, a two- stage stratified cluster  
40 sampling strategy was used. Univariate and multivariable logistic regression was used to determine  
41 the predictive factors for the increase in the use of MCM.

42 Results: Mean age was  $32.3 \pm SD 7.1$  years. Average number of children per woman was  $4.0 \pm 2.0$ .  
43 Use of modern methods of contraceptive was 26.1% [n=441].Statistically significant socio  
44 demographic predictors of MCM included: Number of children 4 or more (AOR 5.234 95%CI  
45 2.78-9.84), Mother having primary education (AOR 1.730 95% CI 1.26-2.36), and Husband  
46 having middle education [AOR 1.69 95% CI 1.03 – 2.76).Maternal health services indicators  
47 included postnatal checkup of mother (AOR 1.46 95% CI 1.09 – 2.05); women who were visited  
48 by Lady Health Workers in their postnatal period and were counseled on family planning  
49 (AOR 1.83 95% CI 1.386 - 2.424).

50 Conclusion: Voluntary uptake of modern contraceptive methods is higher in women having 2 or  
51 more children, having primary education and husband having middle education. Significantly,  
52 receiving post-natal checkup at facility, and Lady Health Worker visit after delivery have more

53 likelihood to opt for contraception. Additionally, young couple counseling on family planning is  
54 imperative to bridge the gap between knowledge and its translation into practice. There is also a  
55 need to focus on the provision of integrated family planning and maternal, newborn, and child  
56 health services through facility-based and community engagement platforms.

57 Keywords: Modern contraceptive methods, Predictors, Family planning, maternal health,  
58 Reproductive health, Lady health worker

59

60

61

62

63

64

65

66

67

68

69

70

## 71 Introduction

72 According to the 7<sup>th</sup> population and housing census 2023, the population of Pakistan stood at 241.5  
73 million, with an annual growth rate of 2.5% making it 5<sup>th</sup> populous country in the world [1]. This  
74 growth rate is double compared to South Asia's average rate (1.2%). It is forecasted to reach 403  
75 million inhabitants in 2050 [2]. This rapid and for the most part, uncontrolled population growth  
76 has contributed to the economic and social crisis. Pakistan faces and affects the health of women  
77 and children disproportionately. Overall, 63% of the population lives in rural areas with low  
78 accessibility to health care services.

79 Global evidence indicates that such rampant population growth rates are also associated with poor  
80 coverage of family planning programs and unmet needs for contraception. Investments in social  
81 determinants and programs for supporting and scaling up modern contraception rates play a key  
82 role in reducing maternal and infant mortality and improving human, social, and economic  
83 development on an individual and national level [3, 4, 5].

84 Despite the benefits of family planning, the use of modern contraceptive methods (MCMs) in  
85 Pakistan has been stagnant for the last decade. The country-wide contraceptive prevalence rate  
86 (CPR) stands at 34%, with MCMs comprising 26% of this rate [6]. Within Pakistan, the second  
87 largest province of Sindh reports contraceptive use at 28.9%, of which 25% is attributed to MCM  
88 use. Such low uptake rates translate into high unmet need 17% amongst married women who are  
89 fecund and desire birth spacing or limit the number of children they have. Despite these needs,  
90 they are currently not accessing or utilizing any methods of contraception. [7].

91 The reasons for this low MCM access and utilization are varied and multifaceted. A major  
92 contributing factor is the prevalence of early marriages, which constitutes 16.3% of all marriages  
93 and primarily involves those between the ages 15 and 19 years [7].

94 In keeping with the need to improve these rates, previous studies have attempted to explore various  
95 predictors of modern contraceptive uptake. Predictors of uptake covered in the local literature  
96 include a woman's age, education, wealth status, and positive attitude towards contraception at an  
97 individual level [8]. Further studies have reported that interventions encompassing elements of  
98 social franchising, mid-level health care providers (community midwives) engagement, and mass  
99 media participation substantially increase the prevalence of contraceptive use [9, 10]. Thus, these  
100 determinants provide an important evidence base to effectively design, implement and further  
101 evaluate interventions aimed at increasing contraceptive uptake.

102 Addressing these determinants requires a distinct strategy, intervention, or program. However,  
103 introducing numerous new programs external to the existing healthcare infrastructure is unfeasible  
104 in light of the country's economic instability combined with a lack of political will and a heavily  
105 underfunded healthcare system [11]. Therefore, the main aim of this paper is to assess the  
106 predictors associated with the uptake of MCMs in the domains of sociodemographic, reproductive,  
107 and maternal health with corresponding knowledge, attitude, and use amongst married women of  
108 reproductive age (MWRA) between 15-49 years in two districts of rural Sindh. Protocol paper has  
109 been published for more details on methodology [12].

## 110 **Methods and Materials**

111 This was a cross-sectional study with face-to-face interviews of married women of reproductive  
112 age at household level, using a structured questionnaire, as the pregnancies in Pakistan primarily  
113 occur following marriage [13]. This survey was conducted in two districts of the province of Sindh:  
114 Matiari and Badin (Figure 1).

115 **Figure 1. Study Sites – Badin and Matiari Districts of Province Sindh, Pakistan**

116 The selection of districts was based on propensity matching score further details could be obtained  
117 from protocol paper [12]. Data was collected on all relevant program indicators, including the  
118 study population's modern contraceptive prevalence rate (mCPR), antenatal and postnatal care  
119 services, skilled birth attendance, and socio-economic and demographic status.

## 120 Sample size estimation

121 As per the Multiple Indicator Cluster Survey for Sindh 2018-2019 [7], the CPR reported for Sindh  
122 province was 28.9%. Based on the CPR, with 95% CI and 80% power, an assumed design effect  
123 of 1.5 and a 7% non-response rate, a sample size of 880 MWRA (15-49 years) per district was  
124 estimated.

125 The targeted population for this study consisted of MWRA between 15-49 years of age residing in  
126 the study districts within the catchment population of public sector health facilities. The exclusion  
127 criteria for the sample included: (i) families who had moved into the project area within three  
128 months with no intent to stay for a prolonged period in the project area and (ii) women of  
129 reproductive age with mental disorders.

130 A two-stage stratified cluster sampling strategy was used to select eligible respondents. Clusters  
131 were created with at least 100-150 households and were established as primary sampling units  
132 (PSUs). In the first sampling stage, clusters were randomly selected from each district's list of  
133 clusters (sampling frame). Subsequently, a line listing operation was conducted to determine  
134 eligible households assigned as secondary sampling units (SSUs). In the second stage, 20 eligible  
135 households with at least one MWRA were selected using systematic sampling to reach the  
136 calculated sample size (covering 44 clusters in each district).

## 137 Survey questionnaire

138 The household questionnaire was adopted from the Pakistan Demographic and Health Survey  
139 (PDHS) questionnaire for women of reproductive age [6]. The questionnaire was then pre-tested  
140 in 5% of the total sample population, then translated into the local Sindhi language. A customized  
141 digital application and software were developed for digital data collection.

## 142 Survey training

143 Before data collection, a five-day training workshop on the data collection process was conducted  
144 for field teams (directly involved in field-based data collection). All sections of the questionnaires  
145 were discussed in detail, followed by a mock field-based data collection activity for data collectors  
146 supervised by the senior research staff. In each district, there are three teams consisting of four  
147 senior research assistants and one research associate who have received 16 years of education in  
148 social or medical allied sciences. The teams were carefully formed based on educational  
149 qualifications and job descriptions to effectively conduct the survey. The last training session was  
150 dedicated to feedback and troubleshooting based on issues reported from the mock exercise. The  
151 sessions involved extensive training on informed consent, manual and digital data collection  
152 processes. Training manuals were developed and distributed to the data collectors and  
153 questionnaires for pilot testing in the field.

## 154 Data collection and data confidentiality

155 The study was conducted in each district by the assigned data collection team consisting of one  
156 team leader and four data collectors. Before the data collection process commenced, line listing  
157 was undertaken in selected clusters. Verbal informed consent was taken from married respondents  
158 and details of the risks and benefits of their participation were explained in the presence of an

159 impartial witness and guardian if respondent was under 18 years of age. They were given an  
160 opportunity to ask any questions they had regarding the study, after which their consent was  
161 obtained (except for those refusing to participate).

162 Data was collected between 1<sup>st</sup> October 2020 and 31<sup>st</sup> December 2020, on personal digital  
163 assistants (Model Samsung SM T289) through an Android application designed for field-based  
164 data collection. Data collection duration was 45- 60 minutes. All data was uploaded electronically,  
165 analyzed, and displayed on the virtual project dashboard. To maintain confidentiality, coded data  
166 was stored in a password-protected and encrypted system, ensuring that only authorized  
167 individuals had access to it.

## 168 Data analysis

169 The collected data was then analyzed in STATA version 17 (Stata Corp, Texas). Descriptive  
170 statistics, bivariate statistical tests, chi-square tests, and independent sample t-tests were used to  
171 summarize the data. Categorical variables were presented in frequency and percentages, while  
172 mean and standard deviation were used for continuous variables. Furthermore, univariate and  
173 multivariable logistic regression was used to determine the predictive factors associated with  
174 increase in the use of modern methods of contraceptives amongst married women of reproductive  
175 age. Variables significant at a p-value of less than 0.20 in the univariate analysis were included  
176 in multivariable logistic regression to measure association at 95% confidence interval [14]. The  
177 final model was constructed using backward elimination; variables were retained if the p-value  
178 was less than 0.05 [15].

## 179 Ethical approval

180 Ethical approval was received from the Ethical Review Committee (ERC) of the Aga Khan  
181 University on July 16, 2020 (2020-3606-18261). The study protocol was approved by the National  
182 Bioethics Committee, Pakistan (4-87/NBC-514/22/857).



## 183 Results

184 From the total sample size of 1,760, 96% (n=1,684) of MWRA were interviewed. There was a  
185 high response rate of 96%, as projected in the interview-based studies at the household level.

### 186 Sociodemographic characteristics of MWRA

187 In terms of sociodemographic characteristics in table 1, the mean age of the study participants  
188 was 32.3years, with a standard deviation (SD) of 7.1 years. Among respondents, 27.0% (n=453)  
189 having formal education. The average number of children per woman was 4.0± 2.0, and the  
190 average number of members living in the household was 7.2 ± 2.7.

191 **Table 1: Socio demographic characteristics of MWRA(n=1,684)**

| Variable                           | Overall  |          |
|------------------------------------|----------|----------|
|                                    | mean     | SD       |
| <b>Household Size</b>              | 7.2      | ±2.7     |
| <b>Respondent's age</b>            | 32.3     | ± 7.1    |
| <b>Husband's Age</b>               | 36.4     | ± 8.5    |
| <b>Number of Children (Parity)</b> | 4.0      | ±2.0     |
| <b>Number of Pregnancies</b>       | 4.2      | ±2.3     |
|                                    | <b>n</b> | <b>%</b> |
| <b>Mother's Education</b>          |          |          |
| No education                       | 1231     | 73.0     |
| Primary                            | 224      | 13.3     |
| Middle                             | 58       | 3.4      |
| Secondary                          | 68       | 4.0      |
| Intermediate or above              | 103      | 6.1      |
| <b>Wealth Quantile</b>             |          |          |
| Poorest                            | 335      | 19.8     |
| Poor                               | 336      | 19.9     |
| Middle                             | 339      | 20.1     |
| Rich                               | 338      | 20.0     |
| Richest                            | 336      | 19.9     |

192

### 193 Current use of contraceptives

194 Table 2 showed that from a total of 1,684 married women, 76.2% (n=1255) reported that they  
195 heard at least one method of family planning to delay pregnancy. The difference in knowledge of

196 contraceptives was found to be significant in current users compared to non-users. Almost half of  
197 the women who reported having knowledge of contraceptives had used family planning methods  
198 in the past. Ever use of any contraceptive method to delay or avoid pregnancy was observed to be  
199 significant amongst respondents.

200 The contraceptive prevalence rate was 27.4 % (n=462) in the sampled population. Furthermore,  
201 the overall use of modern contraceptive methods was observed to be slightly lower at 26.1%  
202 (n=441). Among different methods, the most common methods reported by the respondents were  
203 condoms (n=87; 5.1%) followed by pills (n=83; 5.0%) and injectables (n=63; 3.7%). Out of all the  
204 long-acting reversible methods, less than two percent of the sample population reported using  
205 implants (n=41; 2.4%) and IUDs (n=12; 0.7%). The use of implants was seen as preferential to the  
206 use of IUDs across both districts.

207 Moreover, the lactation amenorrhea method (LAM) use was reported by 6 women. However, one  
208 woman reported the use of standard days methods (SDM). Moreover, among permanent methods  
209 of contraception, 6.5% (n=109) of the respondents reported female sterilization and only one  
210 respondent reported male sterilization method use.

211 The prevalence of traditional methods was less than two percent amongst all surveyed women  
212 (n=22; 1.3%). Among such practices, 1.1% (n=19) of observations were recorded for the  
213 withdrawal method, which was found to be the most common, followed by the rhythm method  
214 (n=3; 0.1%). Additionally, distribution of modern contraceptive methods among socio  
215 demographic characteristics attached as supporting information (S1\_File).

216 **Table 2: Current use of contraceptives reported by MWRA (n=1,684)**

| Characteristics | Overall |   |
|-----------------|---------|---|
|                 | n       | % |
|                 |         |   |

|     |                                                      |      |      |
|-----|------------------------------------------------------|------|------|
| 217 | <b>Ever heard of any method to delay pregnancy</b>   | 1255 | 76.2 |
| 218 | <b>Ever used any method to delay/avoid pregnancy</b> | 625  | 38.5 |
| 219 | <b>Current use of contraceptive</b>                  | 463  | 27.4 |
| 220 | <b>Any modern method</b>                             | 441  | 26.1 |
| 221 | Pills                                                | 83   | 5.0  |
| 222 | Injectables                                          | 63   | 3.7  |
| 223 | Condoms                                              | 87   | 5.1  |
| 224 | Intra Uterine Devices(IUD)                           | 12   | 0.7  |
| 225 | Implant                                              | 41   | 2.4  |
| 226 | Standard Days Method (SDM)                           | 1    | 0.1  |
| 227 | Lactational Amenorrhea Method (LAM)                  | 6    | 0.3  |
| 228 | Female sterilization                                 | 109  | 6.5  |
| 229 | Male sterilization                                   | 1    | 0.1  |
| 230 | <b>Traditional method</b>                            | 22   | 1.3  |
| 231 | Rhythm method                                        | 3    | 0.1  |
| 232 | Withdrawal                                           | 19   | 1.1  |

229  
230

## 231 Predictors for use of modern contraceptive methods (MCM)

232 Table 3 shows the univariate and multivariate analysis of the predictors associated with the use of  
233 modern contraceptives.

### 234 Univariate Analysis

235 The odds of using contraceptives among women with more than four children were four times  
236 higher than those with only one child (OR=3.739; 95% CI=2.274 – 6.149). The likelihood of use  
237 of contraceptives was two times higher for women aged 35-39 years compared to women aged  
238 below 19 years (OR 2.556 95% CI 1.345-4.857). Women who had completed middle-level  
239 education were at least twice as likely to use modern contraceptives to delay pregnancy than those  
240 without education (OR 1.629 95% CI 0.970 – 2.737). Similarly, husbands who had completed their  
241 middle-level education were at least two times more likely to use contraceptives compared to those

242 who were uneducated (OR 1.879 95% CI 1.201 - 2.939). The odds of modern contraceptive use  
243 among women who belonged to the rich wealth index were two times higher than women in the  
244 poorest wealth index category (OR = 1.722. 95% CI 1.051 - 2.).

245 Women who were using health facilities for maternal health services showed a significant increase  
246 in the odds of using contraceptives in their postpartum period compared to women who were not  
247 using health facilities. Mothers who sought antenatal care services had higher odds of adopting  
248 modern contraceptive methods (OR = 1.259 95% CI 0.956-1.778 ) as compared to those who didn't  
249 have ANC visits. Similarly, mothers who had visited health facilities four or more times for  
250 antenatal care checkups were 1.259 times more likely to use contraceptives in their postpartum  
251 period than those who had visited less than four times during their pregnancy.

252 Moreover, mothers who delivered at a health facility showed higher odds of using contraceptives  
253 than those who delivered at home (OR = 1.335 95% CI 0.996 - 1.790). The odds of use of  
254 contraceptives amongst women with cesarean birth were 1.4 times the odds of use of  
255 contraceptives amongst women who had either normal or assisted delivery (95% CI 1.041 - 1.888).  
256 Women who had a postnatal checkup also showed higher odds of using postpartum contraceptives  
257 than those who didn't (OR = 1.330 95% CI 1.008 - 1.754). Lady Health Worker visits after delivery  
258 and for PNC were associated with a significant increase in the odds of the use of contraception  
259 (OR = 2.028 95% CI 1.569- 2.622). Similarly, family planning counseling during antenatal care  
260 visits also showed a significant increase in the odds of the use of postpartum contraceptives  
261 compared to those who had not received any counseling (OR = 1.604 95% CI 0.746-3.446 ).

## 262 Multivariate Analysis

263 The multivariate logistic model shows that women with four or more children are four times more  
264 likely to use contraceptives than those with only one child (AOR = 5.234 95% CI 2.784 - 9.842).  
265 Compared to the bivariate model, after controlling for other covariates, the odds of use of  
266 contraceptives were significantly higher among women who had completed primary education  
267 compared to uneducated women (AOR = 1.730 95%CI 1.264 – 2.367).The odds ratio remained  
268 significant for husbands who had attended middle level education in the multivariate model  
269 (AOR = 1.695 95%CI 1.039- 2.762).The odds of a postnatal checkup of the mother were 1.446  
270 times higher amongst mothers who had used contraceptives (AOR = 1.466 95% CI 1.093-2.052)  
271 as well as women who were visited by the Lady Health Worker in their postnatal period and were  
272 counseled on family planning (AOR = 1.833 95%CI 1.386- – 2.424).

**Table 3: Predictors for use of modern contraceptive method (MCM) among Married Women of Reproductive age (MWRA- 15-49years)**

| Variable                       | Modern Contraceptive Use |             | Univariate Analysis |               | Multivariate Analysis |               |
|--------------------------------|--------------------------|-------------|---------------------|---------------|-----------------------|---------------|
|                                | Yes                      | No          | Crude Odd Ratio     | 95% CI        | Adjusted Odds Ratio   | 95% CI        |
| <b>Number of children</b>      |                          |             |                     |               |                       |               |
| 1                              | 30 (6.8%)                | 230 (18.7%) | 1                   | 1             | 1                     | 1             |
| 2                              | 62 (14.3%)               | 210 (16.4%) | 2.395*              | 1.425 – 4.024 | 2.641*                | 1.445 - 4.825 |
| 3                              | 60 (12.4%)               | 203 (15.9%) | 2.140*              | 1.284 – 3.567 | 2.644*                | 1.401 - 4.990 |
| 4 or more children             | 289 (66.6%)              | 600 (49.0%) | 3.739*              | 2.274 - 6.149 | 5.234*                | 2.784 - 9.842 |
| <b>Mother's age [in years]</b> |                          |             |                     |               |                       |               |
| 15-19                          | 7 (2.2%)                 | 44 (3.9%)   | 1                   | 1             |                       |               |
| 20-24                          | 35 (8.1%)                | 143 (12.0%) | 1.186               | 0.562 - 2.505 | -                     | -             |
| 25-29                          | 58 (12.7%)               | 257 (19.1%) | 1.171               | 0.551 - 2.487 | -                     | -             |
| 30-34                          | 117 (24.9%)              | 310 (25.0%) | 1.747               | 0.806 - 3.787 | -                     | -             |
| 35-39                          | 119 (28.5%)              | 245 (19.6%) | 2.556*              | 1.345 - 4.857 | -                     | -             |
| 40 or above                    | 105 (23.7%)              | 244 (20.5%) | 2.025*              | 0.983 - 4.170 | -                     | -             |
| <b>Mother's education</b>      |                          |             |                     |               |                       |               |
| No education                   | 289 (67.3%)              | 942 (76.0%) | 1                   | 1             | 1                     | 1             |
| Primary                        | 79 (17.4%)               | 145 (12.3%) | 1.599*              | 1.211 - 2.112 | 1.730*                | 1.264 - 2.367 |
| Middle                         | 20 (4.4%)                | 38 (3.0%)   | 1.629*              | 0.970 – 2.737 | 1.671                 | 0.950 - 2.940 |
| Secondary                      | 20 (4.2%)                | 48 (3.8%)   | 1.240               | 0.716 - 2.150 | 1.534                 | 0.820 - 2.867 |
| Intermediate or above          | 33 (6.7%)                | 70 (4.8%)   | 1.579               | 0.931 - 2.677 | 1.819                 | 1.017 - 3.254 |
| <b>Husband's education</b>     |                          |             |                     |               |                       |               |
| No education                   | 158 (38.0%)              | 501 (39.9%) | 1                   | 1             | 1                     | 1             |
| Primary                        | 72 (15.6%)               | 253 (21.1%) | 0.777               | 0.527 - 1.146 | 0.713                 | 0.481 - 1.055 |
| Middle                         | 42 (8.9%)                | 67 (5.0%)   | 1.879*              | 1.201 – 2.939 | 1.695*                | 1.039 – 2.762 |
| Secondary                      | 61 (12.8%)               | 152 (12.2%) | 1.097               | 0.739 – 1.629 | 0.953                 | 0.631-1.439   |
| Intermediate or above          | 107 (24.6%)              | 250 (20.0%) | 1.277               | 0.919 – 1.774 | 0.964                 | 0.657- 1.416  |
| <b>Wealth Index</b>            |                          |             |                     |               |                       |               |
| Poorest                        | 69 (14.4%)               | 266 (19.5%) | 1                   | 1             | 1                     | 1             |
| Poor                           | 70 (16.8%)               | 266 (21.4%) | 1.067               | 0.675 - 1.689 | -                     | -             |
| Middle                         | 93 (21.8%)               | 246 (21.1%) | 1.400               | 0.895 - 2.188 | -                     | -             |

|                                                                  |             |              |        |               |        |               |
|------------------------------------------------------------------|-------------|--------------|--------|---------------|--------|---------------|
| Rich                                                             | 104 (24.7%) | 234 (19.4%)  | 1.722* | 1.051 - 2.820 | -      | -             |
| Richest                                                          | 105 (22.3%) | 231 (18.7%)  | 1.620  | 0.976 – 2.689 | -      | -             |
| <b>Sought ANC</b>                                                | 408 (92.6%) | 1077 (87.4%) | 1.790* | 1.073 - 2.985 | 1.736* | 1.078-2.796   |
| <b>4 or more ANC Visits</b>                                      | 213 (48.8%) | 521 (43.1%)  | 1.259* | 0.956 - 1.778 | -      | -             |
| <b>FP counseling during ANC Check-up</b>                         | 27 (5.9%)   | 50 (3.8%)    | 1.604* | 0.746 – 3.446 | -      | -             |
| <b>LHW Visited during pregnancy</b>                              | 304 (69.0%) | 865 (69.2%)  | 0.988  | 0.742 - 1.37  | -      | -             |
| <b>Facility births</b>                                           | 361 (81.3%) | 949 (76.5%)  | 1.335* | 0.996 - 1.790 | -      | -             |
| <b>Skilled Birth Attendant</b>                                   | 360 (81.1%) | 952 (76.7%)  | 1.308* | 0.973- 1.758  | -      | -             |
| <b>Type of Delivery</b>                                          |             |              |        |               |        |               |
| Normal/Assisted                                                  | 347 (80.0%) | 1046 (84.9%) | 1      | 1             |        |               |
| C-Section                                                        | 94 (20.0%)  | 197 (15.1%)  | 1.402* | 1.041 - 1.888 | -      | -             |
| <b>PNC checkup of mother</b>                                     | 287 (63.0%) | 707 (56.2%)  | 1.330* | 1.008 - 1.754 | 1.466* | 1.093 – 2.052 |
| <b>LHW Visited after delivery</b>                                | 300 (65.7%) | 741 (57.9%)  | 1.397* | 1.076 - 1.813 | -      | -             |
| <b>LHW counseling for family planning as a part of PNC visit</b> | 150 (33.6%) | 253 (20.0%)  | 2.028* | 1.569 - 2.622 | 1.833* | 1.386- 2.424  |

## 273 Discussion

274 This study assessed the predictors for opting for voluntary modern contraceptive methods to  
 275 inform future strategies and decisions. This was achieved through univariate and multivariate  
 276 analysis for specific variables, including knowledge, practices, access, and use of reproductive and  
 277 maternal health services. The results showed the number of children, mother’s education,  
 278 husband’s education, postnatal checkup of mother, and LHW counseling for family planning as  
 279 part of the PNC visit; were the most identified predictors of modern contraceptive methods. The  
 280 results provide an insight into the design of family planning and maternal health programs and the  
 281 required modifications as per the local context.

282 It was noted that the average number of live births was at least four children per MWRA; women  
 283 with more than four children were more likely to use modern contraceptives. This showed a  
 284 significant inclination of the sample population towards limiting their pregnancy rather than

285 spacing between desired pregnancies, particularly in women aged more than 35 years. The  
286 majority of them opted for sterilization, a surgical procedure, while younger respondents tend to  
287 prefer short-acting methods like condoms, pills, and injections. The utilization of long-acting  
288 reversible contraceptives (LARC), such as intrauterine devices (IUDs) and implants, was not  
289 widely observed. These patterns among participants align with the results of similar studies  
290 conducted in similar contexts. [16, 17, 18].

291 Conversely, contraception needs related to desire for spacing are predicted to be greater among  
292 younger women; however, the results show the reverse whereby contraceptive use amongst  
293 younger woman was lower. This dilemma of high need but low use discerned in our results is in  
294 line with the findings of previous studies in similar settings [19, 8].

295 Additionally, the prevalence of contraceptive use among the respondents was almost similar to  
296 that reported in the national and regional statistical records [6, 7]. However, the current study has  
297 highlighted gaps between the awareness and practice of modern contraceptive methods. Though  
298 majority of the participants were aware of contraceptive methods, this did not translate into  
299 practice as consistent with other studies [20]. It also highlights the intention to use contraceptives  
300 and its translation into practice as based on the willingness motivated by the presence and  
301 fulfilment of favorable conditions [21]. This could be indicated as an unmet need for family  
302 planning in married couples [22]. Another significant element contributing to narrowing the gap  
303 between knowledge and application is the accessibility of contraceptive methods along with their  
304 consistent availability. The uninterrupted provision of these methods plays a pivotal role in  
305 addressing the issue of unmet needs and fostering the adoption of MCM [23]. Pakistan, as a  
306 signatory to the Sustainable Development Goals (SDGs) and a participant in the FP 2020  
307 commitments, has taken a firm stance on ensuring comprehensive access to family planning



308 resources, services, and commodities. Diverse initiatives have been initiated within the country in  
309 collaboration with international and domestic non-governmental organizations, with sustained  
310 support from National, Provincial, and District governments. A recent development in this context  
311 is the introduction of the Costed Implementation Plan (CIP) by the Sindh government under the  
312 FP2020-30 initiative [24] which holds the potential to expedite advancements towards achieving  
313 the desired mCPR targets while focusing on the management of supply continuity.

314 Moreover, other negative attitudes and misconceptions, including fear of side effects and a  
315 preference for a male baby, continue to contribute to low uptake of contraceptives [22, 25, 8, 18,  
316 26]. Among subgroups in the sample population, the contraceptive prevalence rate was higher in  
317 women from the rich quintile, similar to other studies in the local context [8, 27]. Interestingly,  
318 women educated at the primary level were more likely to opt for modern contraceptive methods  
319 than women who had attained comparatively higher education as opposed to previous studies [27,  
320 28]. Furthermore, in univariate analysis, contraceptive use showed an increase with increasing  
321 levels of males' education. However, this growth was more significant for husbands who attained  
322 education until the middle level. These findings are compounded by the literature that describes a  
323 comprehensive range of studies on family planning and its association with male engagement [29,  
324 10]. Improving contraceptive uptake and support for opting for methods of choice relies upon the  
325 provision of couple counseling and increased male engagement [30].

326 This study's most important finding was identifying postnatal checkup (PNC) as the most  
327 significant predictor for opting for family planning. Respondents who sought PNC were more  
328 likely to use modern contraceptive methods. Evidence in the literature has endorsed that postnatal  
329 counseling before discharge significantly improves motivation for and practice of contraceptive  
330 uptake [26, 31, 32, 33]. This study also observed that Lady Health Worker's counselling delivered

331 during a PNC visit increased the likelihood of family planning utilization. The probable cause of  
332 this finding can be linked to the preference of the local community for Lady Health Workers to  
333 discuss family planning matters on a one-to-one basis at the household level while maintaining  
334 confidentiality [18]. Moreover, Lady Health Workers also provide family planning commodities  
335 like condoms and pills during their routine visits. Consistent with our results, referral to a health  
336 care facility through LHW also increases postpartum utilization of family planning. Therefore, the  
337 Lady Health Worker Program strongly influences women's fertility choices and their use of sexual  
338 and reproductive health care services [9].

339 Our study population reported a lower prevalence of family planning counseling received during  
340 ANC visit. At the same time, these visits still influenced positive behaviors towards modern  
341 contraceptive methods. In addition to this, family planning exposure was seen to be associated  
342 with subsequent antenatal care visits, a higher number of deliveries performed by skilled  
343 professionals, and a greater chance of delivery at a health facility [9]. Earlier studies have shown  
344 a positive relationship between the delivery of high-quality antenatal family planning counseling  
345 services and increased contraceptive use [34, 35].

346 Another study conducted in a similar setting as our study sites, concluded that in communities  
347 where a higher proportion of women received quality antenatal care with an explanation of the  
348 importance of postpartum family planning and where discussion of birth spacing was more  
349 common, there was significantly higher contraceptive use particularly LARC. [36, 37]. These  
350 studies were short-term funded programs highlighting the need for sustainable programs and  
351 scaling up existing resources. Thus, multiple determinants then affect contraceptive uptake in the  
352 context of Sindh, and strategically addressing these are imperative in improving MCM prevalence  
353 rates.

354 However, what is achievable and sustainable is the expansion of interventions that meet specific  
355 needs and target these factors by utilizing existing healthcare delivery systems.

### 356 Limitations and Strengths

357 A key strength of our cross-sectional study was that we had the opportunity to explore MCM  
358 uptake in the context of multiple, complex factors, unique to the context of rural Sindh. This is  
359 important, given that rural Sindh is home to highly marginalized and vulnerable communities  
360 situated within disaster-prone areas that adversely affect reproductive health outcomes for males  
361 and females.

362 Therefore, this study provides an important evidence-bases that can inform future research,  
363 particularly on the qualitative side, to understand these predictors better and further, strategically  
364 plan to address them at the community and facility level.

365 The cross-sectional study design of our study has several limitations on account of self-reported  
366 data for multiple factors collected at a single point in time. However, this was controlled by the  
367 backward selection of significant indicators for developing a final model of predictors.

368 Furthermore, we kept sociodemographic factors as predictors for family planning practices, which  
369 followed the same pattern as the national trends and were covered by other local studies. The  
370 analysis was further expanded for the studied sociodemographic variables to focus mainly on the  
371 underlying factors influencing contraception uptake in our study districts. Although the data  
372 regarding negative attitudes, concerns about potential side effects, and a preference for male babies  
373 was not specifically addressed in the interviews, these factors have been extensively documented  
374 as contributing to the low adoption of modern contraceptives.

375 Another limitation of our study is that our sampled population resided within the catchment area  
376 of health facilities and already had some form of access to healthcare services in this regard.

377 Despite this limitation, our study population's CPR and MCMs prevalence rate was similar to other  
378 regional and national level surveys. This validated the findings that the location of residence, on  
379 its own, does not affect contraceptive uptake rates [36], making our sample comparable to other  
380 studies.

381 A further limitation of the cross-sectional nature of this study is that findings cannot be used to  
382 analyze all behaviors with regards to contraceptive uptake, given that it has been conducted at one  
383 point in time. Understanding predictors requires a more detailed inquiry into motivations,  
384 specifically, at the individual level, to adopt MCMs and the risks and challenges faced, in day to  
385 day life owing to this. The study tried to mitigate this issue by the use of very detailed  
386 questionnaires that comprehensively covered these aspects to a certain extent.

## 387 Conclusion and Recommendations

388 This study showed that the voluntary uptake of modern contraceptive methods is higher in women  
389 receiving skilled-based delivery, postnatal checkups at the facility, and Lady Health Workers visits  
390 after delivery. Furthermore, the results showed that women used MCMs for limiting pregnancies  
391 rather than spacing and that utilization increases with age. This is an important finding that can be  
392 used to inform behavioral change interventions to improve outcomes.

393 In addition to this, bridging the gap between knowledge and uptake to increase uptake is necessary.  
394 Hence, various recommendations have been proposed in the light of this study for providing family  
395 planning and maternal, newborn, and child health integrated services through facility-based  
396 platforms and community engagement. This is associated with an increased likelihood of modern  
397 contraceptive method acceptance. Integrated services must include antenatal and postnatal care  
398 visits that incorporate family planning services [38, 31, 39]. Providing these services, calls for the

399 capacity strengthening of Lady Health Workers on family planning counseling regarding method-  
400 specific side effects.

401 A further recommendation of this study is to focus on the introduction of feasible and effective  
402 interventions which include in-service training, provision of job aids, and educational materials to  
403 health care providers. This will allow them to counsel patients for family planning effectively.

404 At the community level, initiating and consistently monitoring educational sessions or programs  
405 highlighting the importance of MCM use to community members is important. It should focus on  
406 engaging adolescents through these community-level platforms to educate them about MCM at an  
407 appropriate age to gradually reduce social resistance to uptake. A further focus should be on the  
408 education of young couples on sexual and reproductive health and MCM. Such education,  
409 information, and communication must be developed and delivered within the bounds of privacy  
410 and respect for socio-cultural norms. Eventually, the positive impact emanating from these  
411 initiatives should be used as an evidence base for advocating for policy changes and reform in  
412 reproductive health service delivery and access oriented towards encouraging MCM use and  
413 empowering young girls and women to reach their full potential.

## 414 Acknowledgment

415 We extend our appreciation to the Department of Health and the Population Welfare Department  
416 of the Sindh Government for their essential partnership in project implementation. Our sincere  
417 gratitude is directed towards the study participants, whose involvement and input are highly  
418 valued. Additionally, we acknowledge the dedicated district-based personnel for their consistent  
419 assistance throughout project activities, playing a crucial role in the effective achievement of this  
420 initiative.

421 **Funding Details**

422 “This research was funded by Global Affairs Canada through United Nations Population Fund

423 (UNFPA), grant number SMK532400”

424

425 **Declaration of Interest statement**

426 The authors report there are no competing interests to declare

## 427 References

428

- [1] PBS, "<https://www.pbs.gov.pk/content/announcement-results-7th-population-and-housing-census-2023-digital-census>," Pakistan Bureau of Statistics, August 2023. [Online]. Available: <https://www.pbs.gov.pk/content/population-census>. [Accessed 7 August 2023].
- [2] UN, "United Nations, Department of Economic and Social Affairs, Population Division. World Population Prospects: The 2019 Revision, DVD Edition.," 15 1 2022. [Online]. Available: <http://data.un.org/Data.aspx?q=pakistan+population&d=PopDiv&f=variableID%3a12%3bcrID%3a586>. [Accessed 18 2 2022].
- [3] Wazir MA, Alazar YM, Kadirov B. Family planning: smartest investment for achieving the sustainable developments goals for Pakistan. *J Pak Med Assoc.* 2021 Nov 1;71(11). <https://www.researchgate.net/publication/355789536>
- [4] Chola L, McGee S, Tugendhaft A, Buchmann E, Hofman K. Scaling up family planning to reduce maternal and child mortality: the potential costs and benefits of modern contraceptive use in South Africa. *PloS one.* 2015 Jun 15;10(6):e0130077.
- [5] T Ali SA, Tikmani SS, Harrison MS, Saleem S, Goldenberg RL, McClure EM, Pasha O. Pregnancy Outcomes among Women with an Unintended Pregnancy: Findings from a Prospective Registry in Rural Pakistan. *EC Gynaecology.* 2018;7(2):57. [https://ecommons.aku.edu/pakistan\\_fhs\\_mc\\_chs\\_chs/357](https://ecommons.aku.edu/pakistan_fhs_mc_chs_chs/357)
- [6] PDHS, "National Institute of Population Studies (NIPS) [Pakistan] and ICF.Pakistan Demographic and Health Survey slamabad`, Pakistan`, and Rockville`, Maryland`, USA: NIPS and ICF.," 2017-18.
- [7] MICS, "Multiple Indicator Cluster Survey 2018-19, Bureau of Statistics, Planning & Development Board, Government of Sindh, 2020. Sindh; Survey Findings Report. Karachi, Pakistan: Bureau of Statistics Sindh.," 2020.
- [8] Asif, M.F., Pervaiz, Z. Socio-demographic determinants of unmet need for family planning among married women in Pakistan. *BMC Public Health* 19, 1226 (2019). <https://doi.org/10.1186/s12889-019-7487-5>
- [9] Khan Q, Wang S. The effect of family planning exposure on fertility choices and reproductive health care in rural Pakistan. *Journal of Asian Economics.* 2021 Apr 1;73:101283.<https://doi.org/10.1016/j.asieco.2021.101283>
- [10] Azmat, S.K., Hameed, W., Hamza, H.B. *et al.* Engaging with community-based public and private mid-level providers for promoting the use of modern contraceptive methods in rural Pakistan: results from two innovative birth spacing interventions. *Reprod Health* 13, 25 (2016). <https://doi.org/10.1186/s12978-016-0145-9>

- [11] Hatcher, P., Shaikh, S., Fazli, H. *et al.* Provider cost analysis supports results-based contracting out of maternal and newborn health services: an evidence-based policy perspective. *BMC Health Serv Res* **14**, 459 (2014). <https://doi.org/10.1186/1472-6963-14-459>
- [12] Memon ZA, Reale S, Ahmed W, Spencer R, Lashari TH, Bhutta Z, Soltani H. Effects of integrating family planning with maternal, newborn, and child health services on uptake of voluntary modern contraceptive methods in rural Pakistan: protocol for a quasi-experimental study. *JMIR research protocols*. 2022 Mar 8;11(3):e35291.
- [13] A. a. S. M. A. Aziz, "'Proximate Determinants of Fertility in Pakistan [with Comments].'", *The Pakistan Development Review*, vol. 33, no. 4, pp. 727-42, 1994.
- [14] Teshale AB. Factors associated with unmet need for family planning in sub-Saharan Africa: A multilevel multinomial logistic regression analysis. *PloS one*. 2022 Feb 10;17(2):e0263885.
- [15] Beson, P., Appiah, R. & Adomah-Afari, A. Modern contraceptive use among reproductive-aged women in Ghana: prevalence, predictors, and policy implications. *BMC Women's Health* **18**, 157 (2018). <https://doi.org/10.1186/s12905-018-0649-2>.
- [16] Hackett K, Nausheen S, Yameen S, Hussain I, Khaneez Z, Shah I, Soofi SB. Exploring reasons for low uptake of widely available modern contraceptive methods in Karachi, Pakistan: a mixed-methods study. *J Glob Health Sci*. 2021 Dec;3(2):e12. <https://doi.org/10.35500/jghs.2021.3.e12>
- [17] Gonie, A., Wudneh, A., Nigatu, D. *et al.* Determinants of family planning use among married women in bale eco-region, Southeast Ethiopia: a community based study. *BMC Women's Health* **18**, 50 (2018). <https://doi.org/10.1186/s12905-018-0539-7>
- [18] Mustafa G, Azmat SK, Hameed W, Ali S, Ishaque M, Hussain W, Ahmed A, Munroe E. Family planning knowledge, attitudes, and practices among married men and women in rural areas of Pakistan: Findings from a qualitative need assessment study. *International journal of reproductive medicine*. 2015 Sep 1;2015. <https://doi.org/10.1155/2015/190520>
- [19] Anand BK, Singh J, Mohi MK. Study of unmet need for family planning in immunisation clinic of a teaching hospital at Patiala, India. *The Internet Journal of Health*. 2010;11(1):23-4.
- [20] Mubarik M, Jameel N, Khalil R, Gul S, Women MR. SOURCE OF KNOWLEDGE AND CHOICE OF CONTRACEPTIVE METHOD AMONG MARRIED RURAL WOMEN OF PAKISTAN." *International Journal of Recent Advances in Multidisciplinary Research*, vol. 3, no. 6, pp. 576-1580, 2016. ISSN: 2350-0743
- [21] Agha, S. Intentions to use contraceptives in Pakistan: implications for behavior change campaigns. *BMC Public Health* **10**, 450 (2010). <https://doi.org/10.1186/1471-2458-10-450>



- [22] Avinash KR, Suganthi S, Venmathi E. Prevalence of Contraceptive Methods among Eligible Couples in an Urban Area of Chennai-A Cross Sectional Study. *Journal of Pharmaceutical Research International*. 2021 Dec 13;33(55A):262-7.
- [23] Bakali Mukasa, Moazzam Ali, Madeline Farron & Renee Van de Weerd (2017) Contraception supply chain challenges: a review of evidence from low- and middle-income countries, *The European Journal of Contraception & Reproductive Health Care*, 22:5, 384-390, DOI: [10.1080/13625187.2017.1394453](https://doi.org/10.1080/13625187.2017.1394453)
- [24] CIP, "Costed Implementation Plan on Family Planning for Sindh (2015–2020). Pakistan: Population Welfare Department," Family Planning 2030, Karachi, 2016.
- [25] Channon, M. D. (2017). Son Preference and Family Limitation in Pakistan: A Parity- and Contraceptive Method-Specific Analysis. *International Perspectives on Sexual and Reproductive Health*, 43(3), 99–110. <https://doi.org/10.1363/43e4317>
- [26] Memon Z, Zaidi S, Riaz A. Residual Barriers for Utilization of Maternal and Child Health Services: Community Perceptions From Rural Pakistan. *Glob J Health Sci*. 2015 Nov 3;8(7):47-57. doi: [10.5539/gjhs.v8n7p47](https://doi.org/10.5539/gjhs.v8n7p47). PMID: 26925902; PMCID: PMC4965661
- [27] Azmat, S.K., Ali, M., Ishaque, M. *et al.* Assessing predictors of contraceptive use and demand for family planning services in underserved areas of Punjab province in Pakistan: results of a cross-sectional baseline survey. *Reprod Health* 12, 25 (2015). <https://doi.org/10.1186/s12978-015-0016-9>
- [28] Aslam SK, Zaheer S, Qureshi MS, Aslam SN, Shafique K. Socio-economic disparities in use of family planning methods among Pakistani women: findings from Pakistan demographic and health surveys. *PloS one*. 2016 Apr 7;11(4):e0153313.
- [29] Agha S, Fitzgerald L, Fareed A, Rajbhandari P, Rahim S, Shahid F, Williams E, Javed W, Currie S. Quality of labor and birth care in Sindh Province, Pakistan: Findings from direct observations at health facilities. *PloS one*. 2019 Oct 17;14(10):e0223701.
- [30] Ashfaq, Seemin and Maqsood Sadiq. 2015. "Engaging the missing link: Evidence from FALAH for involving men in family planning in Pakistan—Case study." Washington, DC: Population Council, The Evidence Project. doi: [10.31899/rh5.1001](https://doi.org/10.31899/rh5.1001)
- [31] Baqui AH, Ahmed S, Begum N, Khanam R, Mohan D, Harrison M, Al Kabir A, McKaig C, Brandes N, Norton M, Ahmed S; Projahnmo Study Group in Bangladesh. Impact of integrating a postpartum family planning program into a community-based maternal and newborn health program on birth spacing and preterm birth in rural Bangladesh. *J Glob Health*. 2018 Dec;8(2):020406. doi: [10.7189/jogh.08.020406](https://doi.org/10.7189/jogh.08.020406). PMID: 30023053; PMCID: PMC6036944.
- [32] Udgiri R, Sorganvi V. Knowledge attitude and practices of family planning methods among postnatal mothers-a hospital based study. *Age*. 2016;18(20):21-3. ISSN 0974-1143

- [33] Abbasi Y, Shaikh SR, Memon KN. Barriers and missed opportunities towards immediate and early post-partum family planning methods in Pakistan. *The Professional Medical Journal*. 2020 Jul 10;27(07):1448-53. <https://doi.org/10.29309/TPMJ/2020.27.07.4273>
- [34] León FR, Monge R, Zumarán A, García I, Ríos A. Length of counseling sessions and the amount of relevant information exchanged: a study in Peruvian clinics. *International Family Planning Perspectives*. 2001 Mar 1:28-46. <https://doi.org/10.2307/2673802>
- [35] Sebastian MP, Khan ME, Kumari K, Idnani R. Increasing postpartum contraception in rural India: evaluation of a community-based behavior change communication intervention. *International perspectives on sexual and reproductive health*. 2012 Jun 1:68-77. <https://www.jstor.org/stable/41585361>
- [36] Tappis H, Kazi A, Hameed W, Dahar Z, Ali A, Agha S. The role of quality health services and discussion about birth spacing in postpartum contraceptive use in Sindh, Pakistan: a multilevel analysis. *PloS one*. 2015 Oct 20;10(10):e0139628.
- [37] Ismail A, Ashraf M, Idris IB, Thaver I, Ahmad AM, Siddique SJ. IDENTIFYING FACTORS ASSOCIATED WITH THE USE OF A SCALED-UP POSTPARTUM FAMILY PLANNING PROJECT IMPLEMENTED IN PUNJAB, PAKISTAN. *Malaysian Journal of Public Health Medicine*. 2021 Aug 28;21(2):466-74. <https://doi.org/10.37268/mjphm/vol.21/no.2/art.1091>
- [38] Brickley DB, Chibber K, Azman H, Spaulding A, Lindegren ML, Kennedy C. Systematic Review of Integration between Maternal, Neonatal and Child Health and Nutrition and Family Planning, Final Report. USAID, Cochrane HIV/AIDS Group and University of California, Washington, DC: USAID, Cochrane HIV/AIDS Group and University of California. 2011.
- [39] Cooper CM, Wille J, Shire S, Makoko S, Tsega A, Schuster A, Hausi H, Gibson H, Tappis H. Integrated family planning and immunization service delivery at health facility and community sites in Dowa and Ntchisi districts of Malawi: a mixed methods process evaluation. *International Journal of Environmental Research and Public Health*. 2020 Jun;17(12):4530. <https://doi.org/10.3390/ijerph17124530>
- [40] Caliendo M, Kopeinig S. Some practical guidance for the implementation of propensity score matching. *Journal of economic surveys*. 2008 Feb;22(1):31-72. <https://doi.org/10.1111/j.1467-6419.2007.00527.x>
- [41] Jabeen, S., Rathor, A., Riaz, M. *et al.* Demand- and supply-side factors associated with the use of contraceptive methods in Pakistan: a comparative study of demographic and health surveys, 1990–2018. *BMC Women's Health* **20**, 265 (2020). <https://doi.org/10.1186/s12905-020-01112-4>
- [42] Nadeem, M., Malik, M.I., Anwar, M. *et al.* Women Decision Making Autonomy as a Facilitating Factor for Contraceptive Use for Family Planning in Pakistan. *Soc Indic Res* **156**, 71–89 (2021). <https://doi.org/10.1007/s11205-021-02633-7>

[43] Khowaja F, Pervaiz M, Khatoon N. Male Involvement in Family Planning among Squatter Settlement Residents of Karachi. *Journal of Asian Midwives (JAM)*. 2019;6(1):26-42.

[44] Saleem, S., Rizvi, N., Shahil Feroz, A. *et al.* Perceptions and experiences of men and women towards acceptability and use of contraceptives in underserved areas of Karachi, Pakistan: a midline qualitative assessment of Sukh initiative, Karachi Pakistan. *Reprod Health* **17**, 95 (2020). <https://doi.org/10.1186/s12978-020-00946-3>

429

430 [Supporting Information](#)

431 S1\_File PDF

# Pakistan

medRxiv preprint doi: <https://doi.org/10.1101/2023.09.04.23295034>; this version posted September 5, 2023. The copyright holder for this preprint (which was not certified by peer review) is the author/funder, who has granted medRxiv a license to display the preprint in perpetuity. It is made available under a [CC-BY 4.0 International license](https://creativecommons.org/licenses/by/4.0/).

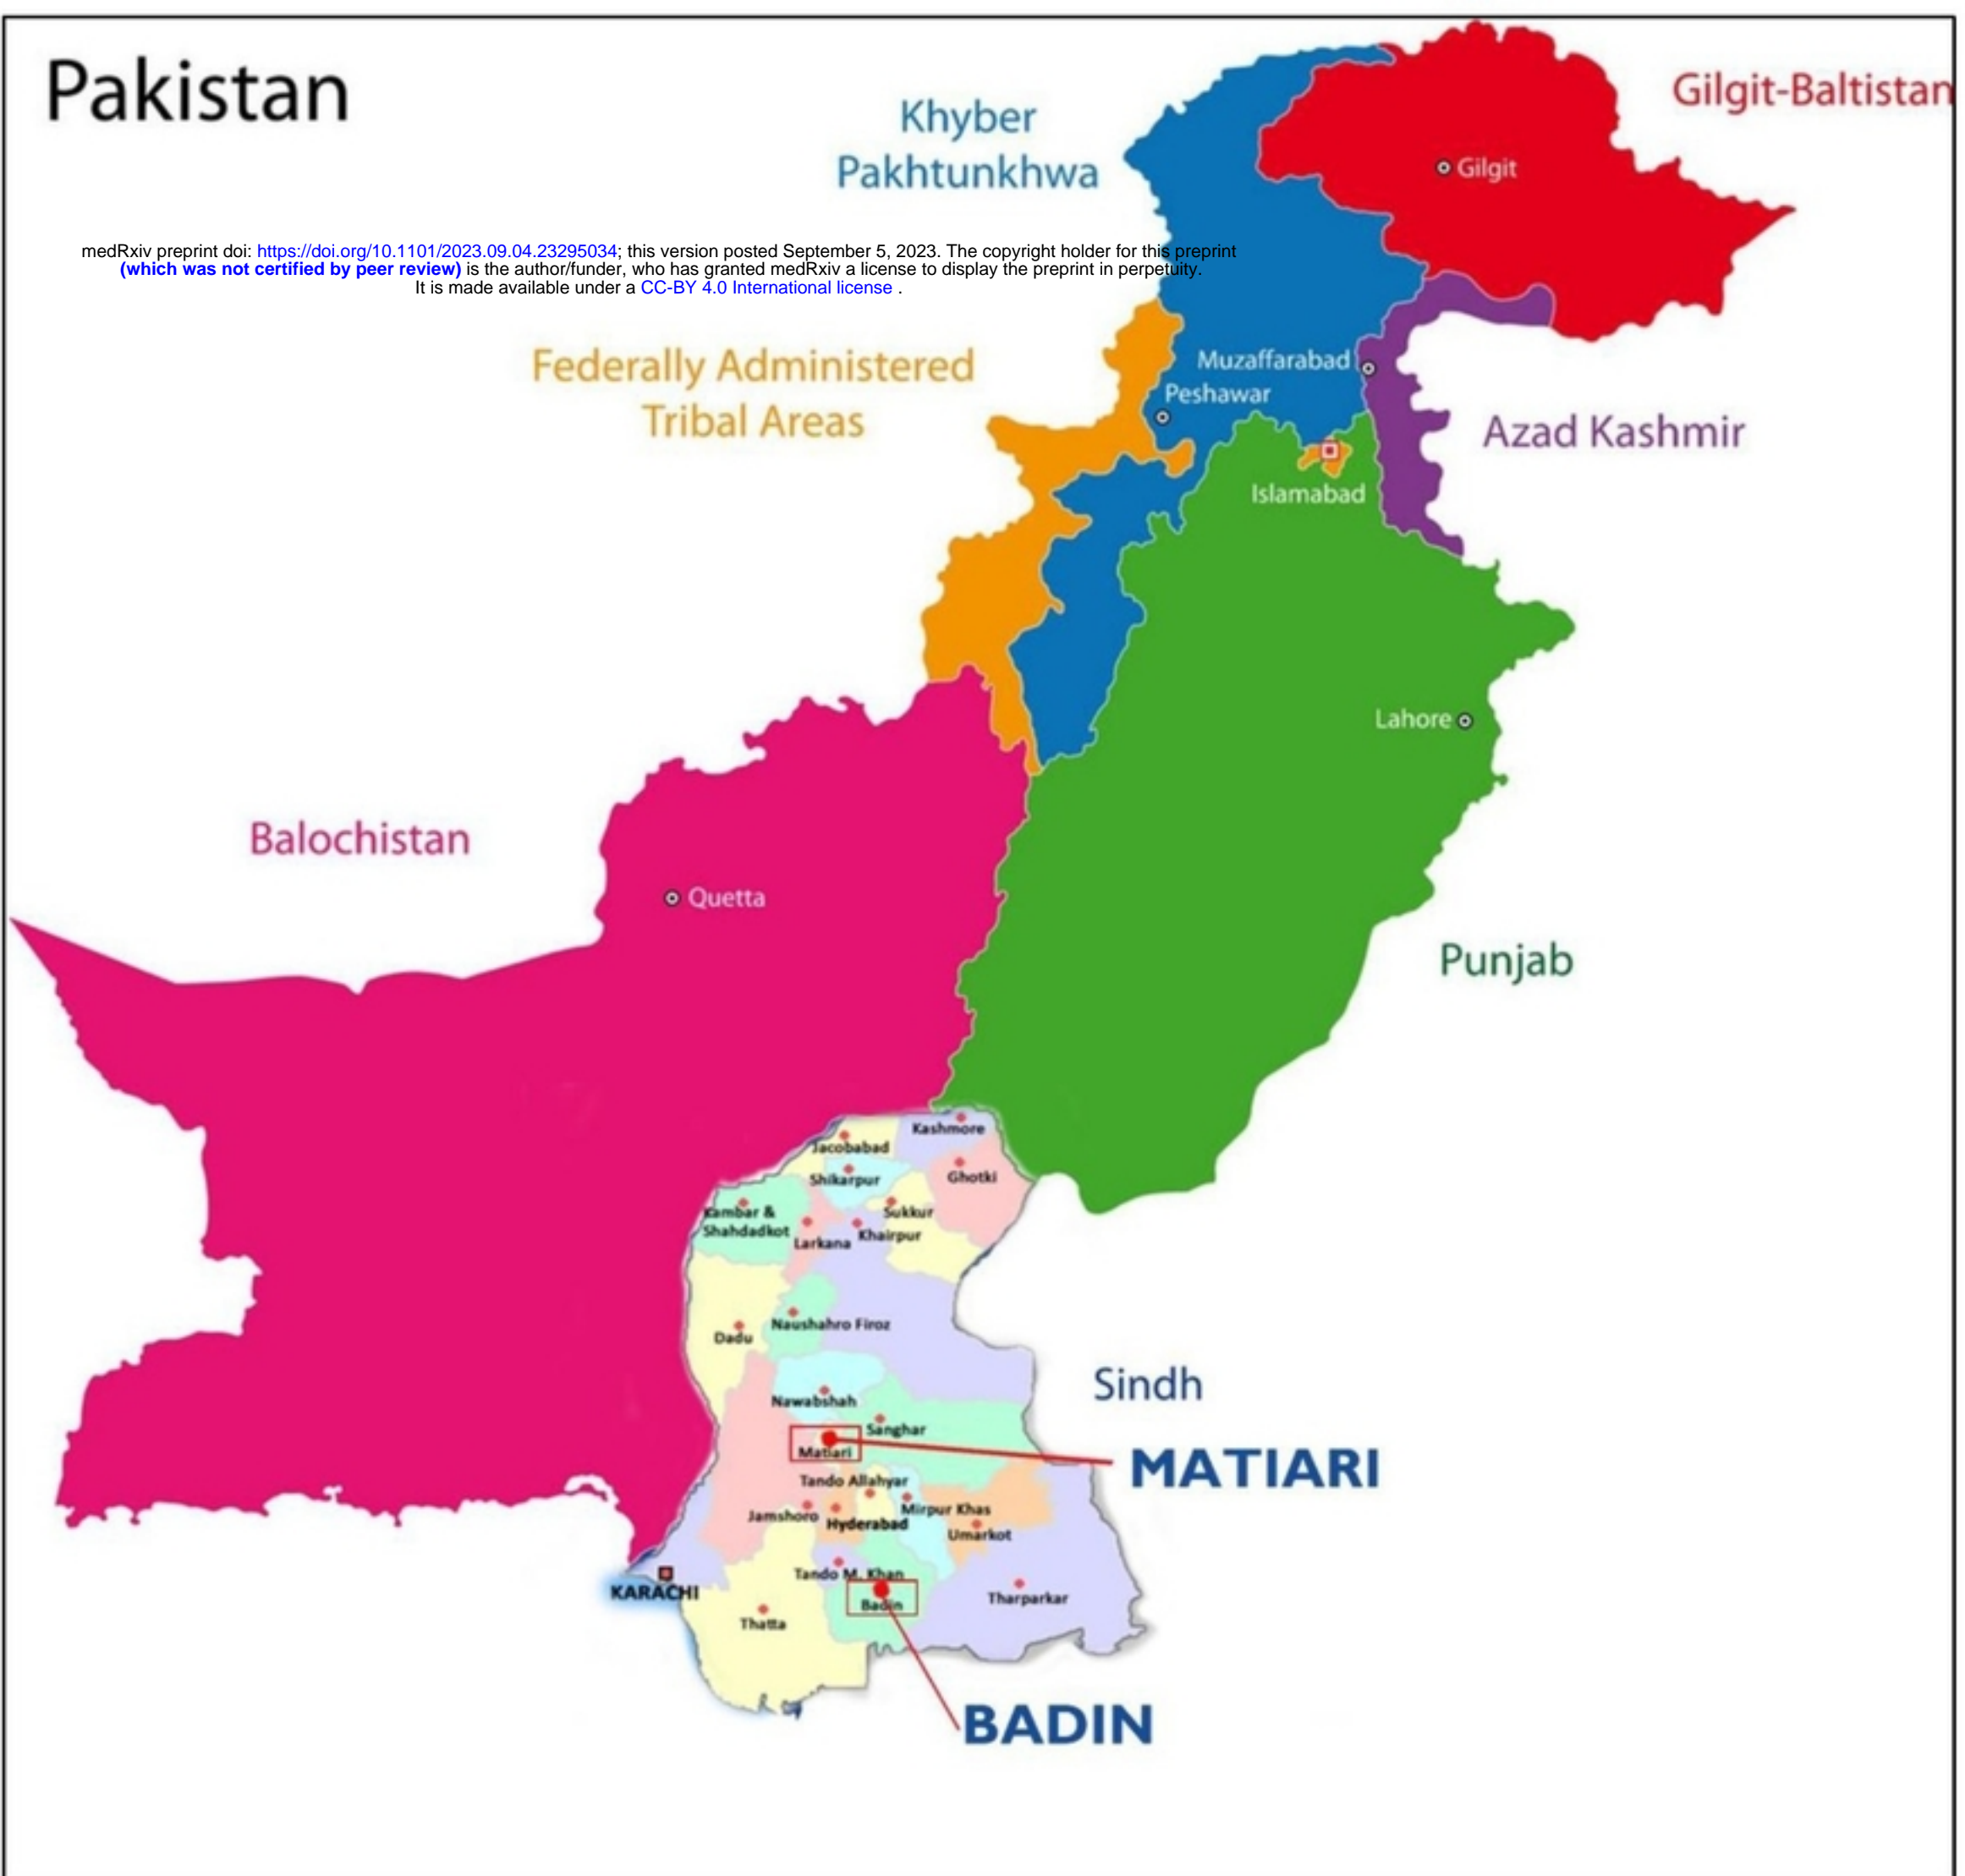

Figure
